# Supplementary material
Source: ML conference proceedings conference paper supplement (https://proceedings.neurips.cc/paper_files/paper/2016/hash/b5a1fc2085986034e448d2ccc5bb9703-Abstract.html)
Supplement: Supplementary file [file b5a1fc2085986034e448d2ccc5bb9703-Supplemental.zip]

---

# Supplementary Material of On Robustness of Kernel Clustering

---

**Bowei Yan**

Department of Statistics and Data Sciences  
University of Texas at Austin

**Purnamrita Sarkar**

Department of Statistics and Data Sciences  
University of Texas at Austin

## A Sub-gaussian random vector

In our analysis, we make use of some useful properties of sub-gaussian random variables, which are defined by the following equivalent properties. More discussions on this topic can be found in [1].

**Lemma A.1** ([1]). *The sub-gaussian norm of  $X$  is denoted by  $\|X\|_{\psi_2}$ ,*

$$\|X\|_{\psi_2} = \sup_{p \geq 1} p^{-1/2} (\mathbb{E}|X|^p)^{1/p}.$$

*Every sub-gaussian random variable  $X$  satisfies:*

- (1)  $P(|X| > t) \leq \exp(1 - ct^2/\|X\|_{\psi_2}^2)$  for all  $t \geq 0$ ;
- (2)  $(\mathbb{E}|X|^p)^{1/p} \leq \|X\|_{\psi_2} \sqrt{p}$  for all  $p \geq 1$ . In particular,  $\text{Var}(X) \leq 2\|X\|_{\psi_2}^2$ .
- (3) Consider a finite number of independent centered sub-gaussian random variables  $X_i$ . Then  $\sum_i X_i$  is also a centered sub-gaussian random variable. Moreover,

$$\left\| \sum_i X_i \right\|_{\psi_2}^2 \leq C \sum_i \|X_i\|_{\psi_2}^2$$

We say that a random vector  $X \in \mathbb{R}^n$  is sub-gaussian if the one-dimensional marginals  $\langle X, x \rangle$  are sub-gaussian random variables for all  $x \in \mathbb{R}^n$ .

We will also see the square of sub-gaussian random variables, the following lemma shows it will be sub-exponential. A random variable is sub-exponential if the following equivalent properties hold with parameters  $K_i > 0$  differing from each other by at most an absolute constant factor.

$$P(|X| > t) \leq \exp(1 - t/K_1) \text{ for all } t \geq 0; \tag{A.1}$$

$$(\mathbb{E}|X|^p)^{1/p} \leq K_2 p \text{ for all } p \geq 1; \tag{A.2}$$

$$\mathbb{E} \exp(X/K_3) \leq e. \tag{A.3}$$

**Lemma A.2** ([1]). *A random variable  $X$  is sub-gaussian if and only if  $X^2$  is sub-exponential. Moreover,*

$$\|X\|_{\psi_2}^2 \leq \|X^2\|_{\psi_1} \leq 2\|X\|_{\psi_2}^2$$

We have a Bernstein-type inequality for independent sum of sub-exponential random variables.

**Lemma A.3** ([1]). *Let  $X_1, \dots, X_N$  be independent centered sub-exponential random variable, and  $M = \max_i \|X_i\|_{\psi_1}$ . Then for every  $a = (a_1, \dots, a_N) \in \mathbb{R}^N$  and every  $t \geq 0$ , we have*

$$P\left(\left|\sum_{i=1}^N a_i X_i\right| \geq t\right) \leq 2 \exp\left[-c \min\left(\frac{t^2}{M^2 \|a\|_2^2}, \frac{t}{M \|a\|_\infty}\right)\right]$$

where  $c > 0$  is an absolute constant.

## B Proof of Theorem 1

To prove Theorem 1, we work with the elementwise expansion. We use  $c$  to represent any constant that does not depend on the parameters, and its value can change from line to line. For  $i \in C_k, j \in C_\ell$ , recall that  $W_i$  is sub-gaussian random vector with mean 0, covariance  $\sigma_k^2 I$  and sub-gaussian norm bounded by  $b$ . We have

$$\|Y_i - Y_j\|_2^2 = \|\mu_k - \mu_\ell\|_2^2 + 2 \frac{(W_i - W_j)^T}{\sqrt{p}} (\mu_k - \mu_\ell) + \frac{\|W_i - W_j\|_2^2}{p} \quad (\text{B.1})$$

As  $W_i$  and  $W_j$  are independent,  $W_i - W_j$  has mean 0 and covariance  $(\sigma_k^2 + \sigma_\ell^2)I$ .

Define

$$\begin{aligned} \beta_{ij} &= \|W_i - W_j\|_2^2/p - (\sigma_k^2 + \sigma_\ell^2), \\ \alpha_{ij} &= (W_i - W_j)'(\mu_k - \mu_\ell)/\sqrt{p}. \end{aligned}$$

Hence  $\mathbb{E}\beta_{ij} = 0$ . By the Lipschitz continuity of  $f$ ,

$$|K_{ij} - \tilde{K}_{ij}| \leq 2C_0|\beta_{ij} + 2\alpha_{ij}| \quad (\text{B.2})$$

By Lemma A.1-(3),  $\alpha_{ij}$  is also sub-gaussian, with sub-gaussian norm upper bounded by  $2bd_{k\ell}^2 C/p$ , for some  $C > 0$ . Then by Lemma A.1-(1),  $\exists C_1 > 0$  s.t.

$$P\left(|\alpha_{ij}| \geq c\sqrt{\frac{\log p}{p}}\right) \leq p^{-C_1 c^2} \quad (\text{B.3})$$

$$\beta_{ij} = \sum_{d=1}^p (W_i^{(d)} - W_j^{(d)})^2/p - (\sigma_k^2 + \sigma_\ell^2). \quad (\text{B.4})$$

To bound  $\beta_{ij}$ , note each summand in Eq. (B.4) is a squared sub-gaussian random variable, thus is a sub-exponential random variable by Lemma A.2. By Lemma A.3 with  $t = c\sqrt{\frac{\log p}{p}}$ , we see that with  $a = (1, \dots, 1)/p$ ,  $\min\left(c^2 \frac{t^2}{M^2 \|a\|_2^2}, c \frac{t}{M \|a\|_\infty}\right) = \min\left(\frac{c^2 \log p}{M^2}, \frac{c\sqrt{p \log p}}{M}\right) \geq c' \log p$  for large enough  $p$ . Thus  $\exists C_2 > 0$  such that for large enough  $p$ ,

$$P\left(|\beta_{ij}| \leq c\sqrt{\frac{\log p}{p}}\right) \geq 1 - p^{-C_2 c^2} \quad (\text{B.5})$$

By union bound, for some  $\rho > 0$ , with probability at least  $1 - n^2 p^{-\rho c^2}$ ,

$$\sup_{i,j \in \mathcal{I}} |K_{ij} - \tilde{K}_{ij}| \leq c\sqrt{\frac{\log p}{p}}.$$

## C Proof of Lemma 1

Define a diagonal matrix  $D$  where  $D_{ii} = f(\sigma_k^2)$ , if  $i \in C_k$  and 0 if  $i \in \mathcal{O}$ . Write  $\tilde{K}_0 = \tilde{K} - I + D^2$ , which is basically replacing the diagonal of  $\tilde{K}$  to make it blockwise constant. By the fact  $f(d_{k\ell}^2 + \sigma_k^2 + \sigma_\ell^2) = f(d_{k\ell}^2)f(\sigma_k^2)f(\sigma_\ell^2)$ ,  $\tilde{K}_0$  has the decomposition  $\tilde{K}_0 = DZBZ^T D$  where  $B \in \mathbb{R}_{r \times r}$  and  $B_{k\ell} = f(d_{k\ell}^2)$ . In fact,  $B$  is exactly the Gaussian kernel matrix generated by  $\{\mu_i\}_{i=1}^r$  centers, and is strictly positive semi-definite when the scale parameter  $\eta \neq 0$  and centers are all different. Hence  $\tilde{K}_0$  is rank  $r$ .

$$\lambda_r(DZBZ^T D) = \lambda_r(B^{1/2} Z^T D^2 Z B^{1/2}) = \lambda_r(BZ^T D^2 Z)$$

The first equality uses the fact that  $XX^T$  and  $X^T X$  has the same set of eigenvalues. The second step uses the fact that  $B$  is full rank, since all clusters have distinct means. Now  $B$  and  $Z^T D^2 Z$  are both  $r \times r$  positive definite matrices. So the  $r$ th eigenvalue is the smallest eigenvalue. Now we use,  $\lambda_{\min}(BZ^T D^2 Z) \geq \lambda_{\min}(B)\lambda_{\min}(Z^T D^2 Z)$  and have

$$\lambda_r(\tilde{K}_0) \geq \lambda_r(Z^T D^2 Z)\lambda_r(B) \geq \frac{n}{r}\lambda_{\min}(B) \cdot \min_k (f(\sigma_k^2))^2.$$

Then  $\lambda_r(\tilde{K}_0) = \Omega(\frac{n}{r})$ . On the other hand,  $\|I - D^2\|_2 \leq \max_k (1 - f(2\sigma_k^2))$ . Let  $\lambda_r(\tilde{K})$ ,  $\lambda_{r+1}(\tilde{K})$  be the  $r^{th}$  and  $r+1^{th}$  eigenvalue of  $\tilde{K}$ , by Weyl's inequality,

$$\lambda_r(\tilde{K}) \geq \lambda_r(\tilde{K}_0) - \max_k (1 - f(2\sigma_k^2)) = \Omega(\frac{n}{r}\lambda_{\min}(B))$$

$$\lambda_{r+1}(\tilde{K}) \leq \max_k (1 - f(2\sigma_k^2)) = O(1) \quad (\text{C.1})$$

Putting pieces together,

$$\lambda_r(\tilde{K}) - \lambda_{r+1}(\tilde{K}) \geq \frac{n}{r}\lambda_{\min}(B) \cdot \min_k (f(\sigma_k^2))^2 - 2\max_k (1 - f(2\sigma_k^2)) = \Omega\left(\frac{n}{r}\lambda_{\min}(B)\right).$$

## D Proof of Lemma 2

*Proof.* First note that  $\hat{X}$  is the optimal solution of (SDP-1), so  $\langle K, \hat{X} \rangle \geq \langle K, X_0 \rangle$ . Hence  $\langle K - \tilde{K}, \hat{X} - X_0 \rangle \geq \langle \tilde{K}, X_0 - \hat{X} \rangle$ .

Let  $a := \min_k f(2\sigma_k^2)$ ,  $b := \max_{k \neq \ell} f(d_{k\ell}^2 + \sigma_k^2 + \sigma_\ell^2)$  and  $\gamma_{\min} := a - b$ , we have

$$\begin{aligned} \langle \tilde{K}, X_0 - \hat{X} \rangle &= \sum_k \sum_{i \in \tilde{C}_k} \left( \sum_{j \in \tilde{C}_k} f(2\sigma_k^2)(1 - \hat{X}_{ij}) - \sum_{\ell \neq k} \sum_{j \in \tilde{C}_\ell} f(d_{k\ell}^2 + \sigma_k^2 + \sigma_\ell^2) \hat{X}_{ij} \right) \\ &\geq \sum_k \sum_{i \in \tilde{C}_k} \left( a \sum_{j \in \tilde{C}_k} (1 - \hat{X}_{ij}) - b \sum_{\ell \neq k} \sum_{j \in \tilde{C}_\ell} \hat{X}_{ij} \right) \\ &\geq \sum_k \sum_{i \in \tilde{C}_k} \left( a \sum_{j \in \tilde{C}_k} (1 - \hat{X}_{ij}) - b \left( \frac{n}{r} - \sum_{j \in \tilde{C}_k} \hat{X}_{ij} \right) \right) \\ &\geq \gamma_{\min} \sum_k \sum_{i \in \tilde{C}_k} \sum_{j \in \tilde{C}_k} (1 - \hat{X}_{ij}) \end{aligned} \quad (\text{D.1})$$

On the other hand, by the fact that  $\hat{X}_{ij} \geq 0$  and row sum is  $n/r$ ,

$$\begin{aligned} \|X_0 - \hat{X}\|_1 &= \sum_k \sum_{i \in \tilde{C}_k} \left( \sum_{j \in \tilde{C}_k} (1 - \hat{X}_{ij}) + \sum_{\ell \neq k} \sum_{j \in \tilde{C}_\ell} \hat{X}_{ij} \right) \\ &= \sum_k \sum_{i \in \tilde{C}_k} \left( \sum_{j \in \tilde{C}_k} (1 - \hat{X}_{ij}) + \left( n/r - \sum_{j \in \tilde{C}_k} \hat{X}_{ij} \right) \right) \\ &\leq 2 \sum_k \sum_{i \in \tilde{C}_k} \sum_{j \in \tilde{C}_k} (1 - \hat{X}_{ij}) \end{aligned} \quad (\text{D.2})$$

Equations (D.1) and (D.2) gives us:

$$\|X_0 - \hat{X}\|_1 \leq \frac{2}{\gamma_{\min}} \langle \tilde{K}, X_0 - \hat{X} \rangle \leq \frac{2\langle K - \tilde{K}, \hat{X} - X_0 \rangle}{\gamma_{\min}}$$

□

## E Proof of Theorem 2

By Lemma 2,

$$\|X_0 - \hat{X}\|_1 \leq \frac{2\langle \tilde{K}, X_0 - \hat{X} \rangle}{\gamma_{\min}} \leq \frac{2\langle K - \tilde{K}, \hat{X} - X_0 \rangle}{\gamma_{\min}}$$

Divide the inner product into inlier part and outlier part, and note that  $0 < |K_{ij} - \tilde{K}_{ij}| < 1, \forall i, j$ . By Theorem 1, w.p. at least  $1 - n^2 p^{-\rho c^2}$ , we have

$$\begin{aligned} & \langle K - \tilde{K}, \hat{X} - X_0 \rangle \\ &= \sum_{(i,j) \in \mathcal{I} \times \mathcal{I}} (K_{ij} - \tilde{K}_{ij})(\hat{X}_{ij} - (X_0)_{ij}) + \sum_{(i,j) \in \mathcal{R}} (K_{ij} - \tilde{K}_{ij})(\hat{X}_{ij} - (X_0)_{ij}) \\ &\leq \|\hat{X} - X_0\|_1 \cdot \|K^{\mathcal{I} \times \mathcal{I}} - \tilde{K}^{\mathcal{I} \times \mathcal{I}}\|_\infty + \sum_{(i,j) \in \mathcal{R}} (\hat{X}_{ij} - (X_0)_{ij})(K_{ij} - \tilde{K}_{ij}) \\ &\leq \|\hat{X} - X_0\|_1 \cdot \|K^{\mathcal{I} \times \mathcal{I}} - \tilde{K}^{\mathcal{I} \times \mathcal{I}}\|_\infty + \sum_{(i,j) \in \mathcal{R}} \hat{X}_{ij}(K_{ij} - \tilde{K}_{ij}) - \sum_{(i,j) \in \mathcal{R}} (X_0)_{ij}(K_{ij} - \tilde{K}_{ij}) \\ &\leq \|\hat{X} - X_0\|_1 \cdot \|K^{\mathcal{I} \times \mathcal{I}} - \tilde{K}^{\mathcal{I} \times \mathcal{I}}\|_\infty + \sum_{(i,j) \in \mathcal{R}} \hat{X}_{ij} + \sum_{(i,j) \in \mathcal{R}} (X_0)_{ij} \\ &\leq C \sqrt{\frac{\log p}{p}} \|X_0 - \hat{X}\|_1 + \frac{4mn}{r} \end{aligned}$$

Thus,

$$\left( \gamma_{\min} - 2C \sqrt{\frac{\log p}{p}} \right) \|\hat{X} - X_0\|_1 \leq \frac{4mn}{r}$$

When  $\sqrt{\frac{\log p}{p}} = o(\gamma_{\min})$ , rearranging terms gives

$$\|X_0 - \hat{X}\|_1 \leq \frac{\frac{4mn}{r}}{\gamma_{\min} - C \sqrt{\frac{\log p}{p}}} \leq \frac{4mn}{r \gamma_{\min}} \left( 1 + \frac{C'}{\gamma_{\min}} \sqrt{\frac{\log p}{p}} \right) = O\left( \frac{mn}{r \gamma_{\min}} \right)$$

## F Davis-Kahan Theorem

**Theorem F.1** ([2]). *Let  $\Sigma, \hat{\Sigma} \in \mathbb{R}^{p \times p}$  be symmetric, with eigenvalues  $\lambda_1 \geq \dots \geq \lambda_p$  and  $\hat{\lambda}_1 \geq \dots \geq \hat{\lambda}_p$  respectively. Fix  $1 \leq r \leq s \leq p$  and assume that  $\min(\lambda_{r-1} - \lambda_r, \lambda_{s-1} - \lambda_s) > 0$ , where  $\lambda_0 := \infty$  and  $\lambda_{p+1} := -\infty$ . Let  $d := s - r + 1$ , and let  $V = (v_r, v_{r+1}, \dots, v_s) \in \mathbb{R}^{p \times d}$  and  $\hat{V} = (\hat{v}_r, \hat{v}_{r+1}, \dots, \hat{v}_s) \in \mathbb{R}^{p \times d}$  have orthonormal columns satisfying  $\Sigma v_j = \lambda_j v_j$  and  $\hat{\Sigma} \hat{v}_j = \hat{\lambda}_j \hat{v}_j$ , for  $j = r, r+1, \dots, s$ . Then there exists an orthogonal matrix  $\hat{O} \in \mathbb{R}^{d \times d}$  such that*

$$\|\hat{V} \hat{O} - V\|_F \leq \frac{2^{3/2} \|\hat{\Sigma} - \Sigma\|_F}{\min(\lambda_{r-1} - \lambda_r, \lambda_{s-1} - \lambda_s)}.$$

## G Proof of Lemma 3

We prove the result for k-means on  $\hat{X}$ . Let  $\hat{U}$  be the top  $r$  eigenvectors of  $\hat{X}$ ,  $U \in \mathbb{R}^{n \times r}$  be the top  $r$  eigenvector of  $X_0$ , then by construction, it can be written as  $U = \begin{bmatrix} U^{\mathcal{I}} \\ U^{\mathcal{O}} \end{bmatrix}$ . Let  $\nu \in \mathbb{R}^{r \times r}$  be the population value of the eigenvector corresponding to each cluster,  $U = Z\nu$ .  $U$  is a unit basis so we know  $I = U^T U = \nu^T Z^T Z \nu = \frac{n}{r} \nu^T \nu$ . So  $\nu^T \nu = \frac{r}{n} I_r$ .

Define  $\mathcal{C} = \{M \in \mathbb{R}^{n \times r} : M \text{ has no more than } r \text{ unique rows}\}$ . Then minimizing the k-means objective for  $\hat{U}$  is equivalent to

$$\min_{\{m_1, \dots, m_r\} \subset \mathbb{R}^r} \sum_i \min_g \|\hat{u}_i - m_g\|_2^2 = \min_{M \in \mathcal{C}} \|\hat{U} - M\|_F^2$$

So  $C = [c_1, \dots, c_n] = \arg \min_{M \in \mathcal{C}} \|\hat{U} - M\|_F^2$  and  $\|C - \hat{U}\| \leq \|Z\nu O - \hat{U}\|$ .  $c_i$  is the center assigned to point  $i$  by running k-means on  $\hat{U}$ .

When  $i, j \in \mathcal{I}, Z_i \neq Z_j$ ,

$$\|Z_i\nu - Z_j\nu\| = \|(Z_i - Z_j)\nu\| \geq \sqrt{2} \min_{x: \|x\|^2=1} \sqrt{x^T \nu \nu^T x} = \sqrt{\frac{2r}{n}}$$

So

$$\|c_i - Z_j\nu O\|_2 \geq \|Z_i\nu - Z_j\nu\| - \|c_i - Z_i\nu O\| \geq \sqrt{\frac{2r}{n}} - \sqrt{\frac{r}{2n}} = \sqrt{\frac{r}{2n}} \quad (\text{G.1})$$

Therefore when  $i, j \in \mathcal{I}$  and  $Z_i \neq Z_j$ ,  $\|c_i - Z_i\nu O\| < \sqrt{\frac{r}{2n}} \Rightarrow \|c_i - Z_i\nu O\|_2 < \|c_i - Z_j\nu O\|_2$ , which means node  $i$  is correctly clustered.

Now we bound the cardinality of  $\mathcal{M}$ .

$$\begin{aligned} |\mathcal{M}| &\leq \frac{2n}{r} \sum_{i \in \mathcal{I}} \|c_i - Z_i\nu O\|_F^2 = \frac{2n}{r} \|C^{\mathcal{I}} - U^{\mathcal{I}}O\|_F^2 \\ &\leq \frac{2n}{r} (\|C^{\mathcal{I}} - \hat{U}^{\mathcal{I}}\|_F + \|\hat{U}^{\mathcal{I}} - U^{\mathcal{I}}O\|_F)^2 \\ \|C^{\mathcal{I}} - \hat{U}^{\mathcal{I}}\|_F^2 &= \|\hat{U} - C\|_F^2 - \|C^{\mathcal{O}} - \hat{U}^{\mathcal{O}}\|_F^2 \\ &\leq \|\hat{U} - C\|_F^2 \leq \|\hat{U} - UO\|_F^2 \end{aligned}$$

Therefore,

$$|\mathcal{M}| \leq \frac{2n}{r} (\|\hat{U} - UO\|_F + \|\hat{U}^{\mathcal{I}} - U^{\mathcal{I}}O\|_F)^2 \leq \frac{8n}{r} \|\hat{U} - UO\|_F^2$$

For k-means procedure on  $K$ , note that  $\tilde{K}$  is blockwise constant except for the diagonals. It can be shown that the top  $r$  eigenvectors of  $\tilde{K}$  are also piecewise constant. The rest of the analysis is similar to that of  $\hat{X}$ .

## H Proof of Corollary 1

*Proof.* Denote by  $d_0$  the distance between clusters,  $\alpha = f(2\sigma^2)$ ,  $\beta = f(d_0^2 + 2\sigma^2)$ , hence  $\gamma_{\min} = \alpha - \beta$ . Then  $\tilde{K}$  has the form  $(\alpha - \beta)X_0 + \beta E + (1 - \alpha)I$ , and  $\lambda_r(\tilde{K}) \geq \gamma_{\min}n/r$ , since  $\beta E + (1 - \alpha)I$  is positive semidefinite.

On the other hand, from Lemma 1 and Eq. (C.1),  $\lambda_{r+1}(\tilde{K}) \leq 1 - f(2\sigma^2) \leq 1$ . Hence  $\lambda_r - \lambda_{r+1} \geq \frac{n}{r}\gamma_{\min} - 1$ . By Lemma 3 the misclassification rate of K-SVD becomes:

$$\begin{aligned} |\mathcal{M}_{ksvd}| &\leq C \frac{n}{r} \left( \frac{2^{3/2} \|\tilde{K} - K\|_F}{\lambda_r(\tilde{K}) - \lambda_{r+1}(\tilde{K})} \right)^2 \\ &\leq C \frac{n}{r} \left( \frac{\max \left\{ n \sqrt{\frac{\log p}{p}}, \sqrt{mn} \right\}}{\frac{n}{r}\gamma_{\min}} \right)^2 \\ &\leq \max \left( O_P \left( \frac{nr}{\gamma_{\min}^2} \right), O_P \left( \frac{nr \log p/p}{\gamma_{\min}^2} \right) \right) \end{aligned}$$

□

## References

- [1] R. Vershynin. Introduction to the non-asymptotic analysis of random matrices. *arXiv preprint arXiv:1011.3027*, 2010.
- [2] Y. Yu, T. Wang, and R. Samworth. A useful variant of the davis–kahan theorem for statisticians. *Biometrika*, 102(2):315–323, 2015.
